# Supplementary material for: Force induced DNA melting in the presence of an attractive surface
Source: Royal Society of Chemistry journal article supplement (doi:10.1039/d3sm00037k), 2023-01-01
Supplement: d3sm00037k1.pdf [file d3sm00037k1.pdf]

## Supplementay Text: Force induced DNA melting in presence of attractive surface

Dibyajyoti Mohanta

Center of Environmental and Climate Science, Lund University

Debaprasad Giri

Department of Physics, Indian Institute of Technology (B.H.U)

Sanjay Kumar

Department of Physics, Banaras Hindu University

In order to study the effect of dsDNA length on adsorption-induced unzipping, we have plotted the adsorption energy where unzipping takes place ( $\epsilon_{st}$ ) upon application of force on strand-II, with the length of the chain. The figure clearly demonstrates a strong dependence of the adsorption energy ( $\epsilon_{st}$ ) on the length of the dsDNA chain. As the chain length increases, the magnitude of  $\epsilon_{st}$  also increases, approaching a value of 1.

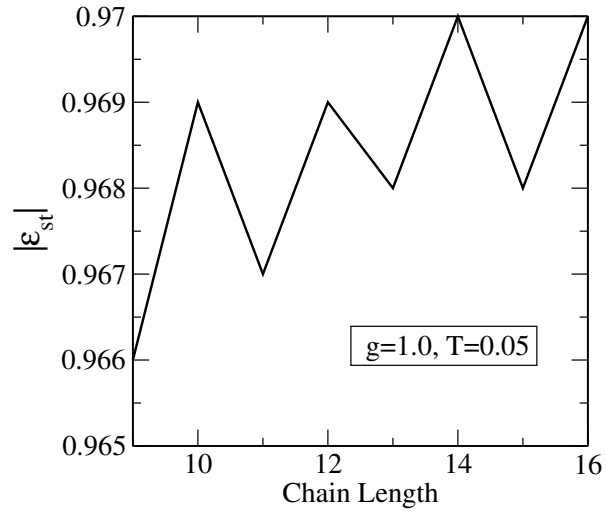

Sl 1: Variation of surface adsorption energy where unzipping takes place ( $|\epsilon_{st}|$ ) as a function of chain length at  $g = 1.0$  and  $T = 0.05$ . The zig-zag pattern is due to the odd-even size effect of the finite chain.
